# Supplementary material for: Nanocomposite hollow fiber membranes with recyclable β-cyclodextrin encapsulated magnetite nanoparticles for water vapor separation
Source: Royal Society of Chemistry journal article supplement (doi:10.1039/c8ta09413f), 2018-01-01
Supplement: c8ta09413f1.pdf [file c8ta09413f1.pdf]

Electronic Supplementary Material (ESI) for Journal of Materials Chemistry A. This journal is © The Royal Society of Chemistry 2018

ELECTRONIC SUPPLEMENTARY INFORMATION

## Nanocomposite Hollow Fiber Membranes with Recyclable $\beta$ -Cyclodextrin

### Encapsulated Magnetite Nanoparticles for Water Vapor Separation

*Ali M. Abou-Elanwar, Yogita M. Shirke, Pravin G. Ingole, Won-Kil Choi, Hyojin Lee,*

*Seong Uk Hong, Hyung Keun Lee, Jae-Deok Jeon\**

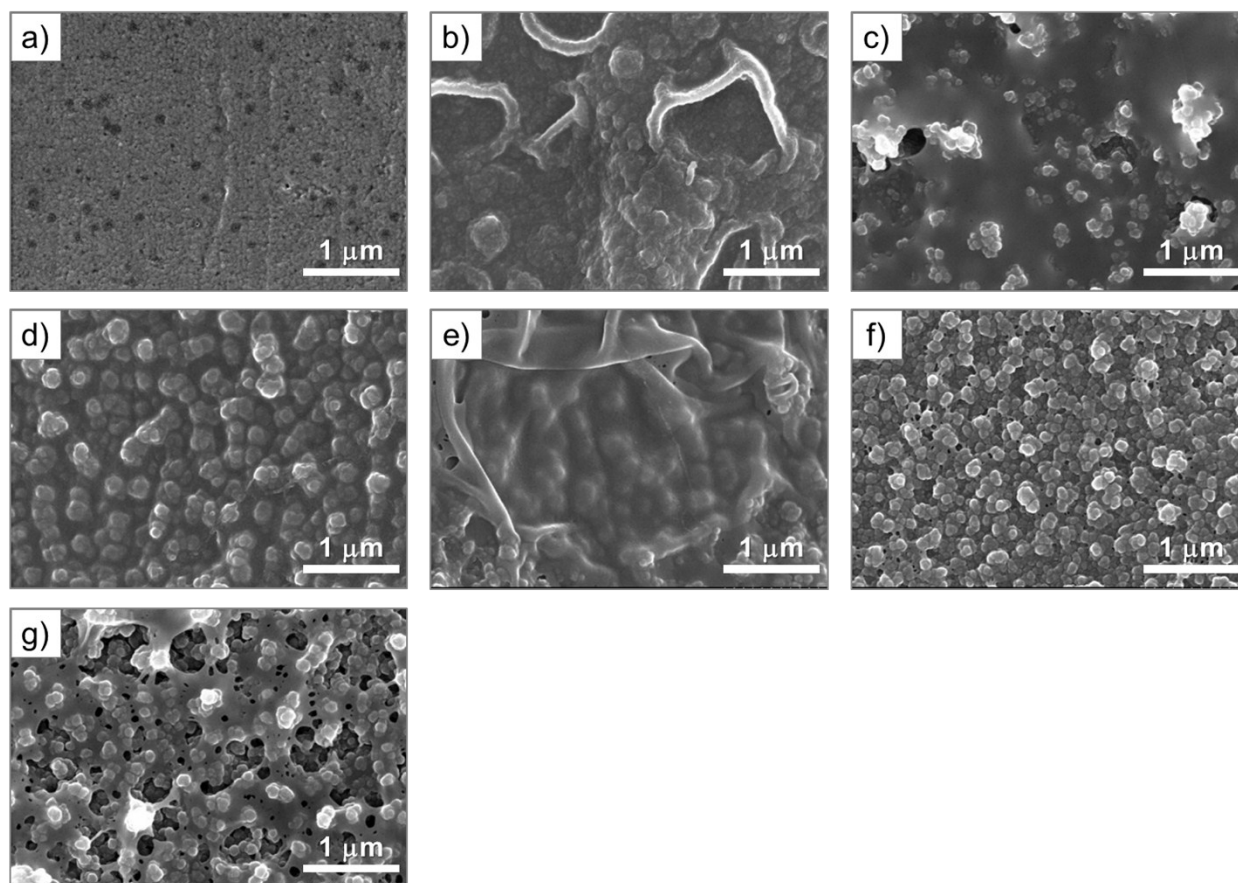

**Fig. S1** The surface morphology of the PSf substrate, TFC and TFN membranes: a) PSf, b) M(0), c) M(0.05), d) M(0.1), e) M(0.2), f) M(0.5), g) M(1.0).

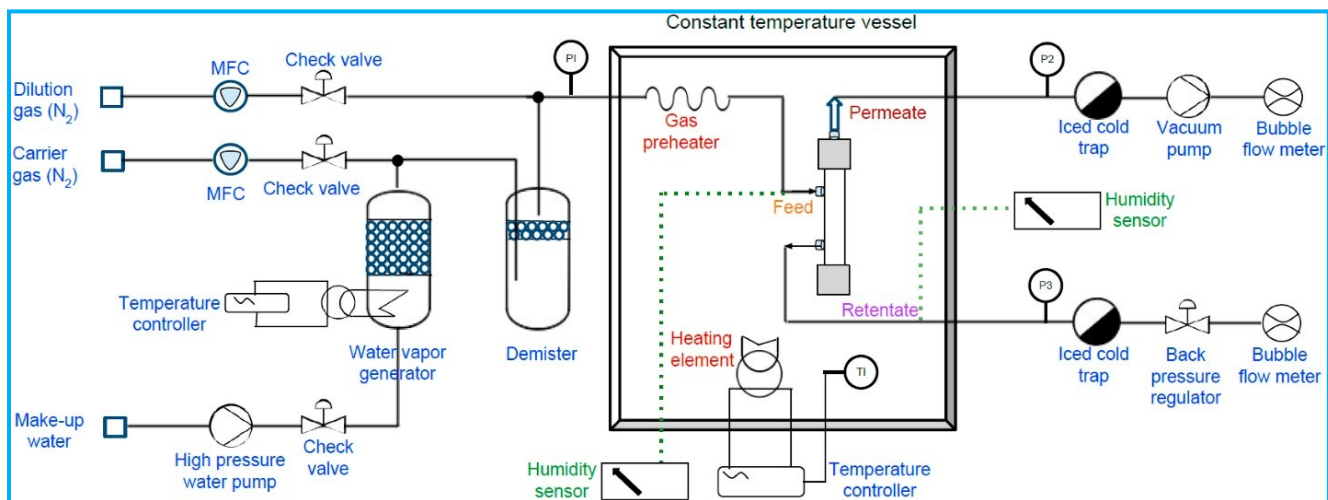

Fig. S2 Lab scale experimental set-up for the water vapor/N<sub>2</sub> mixed gas separation (Ref. 55).

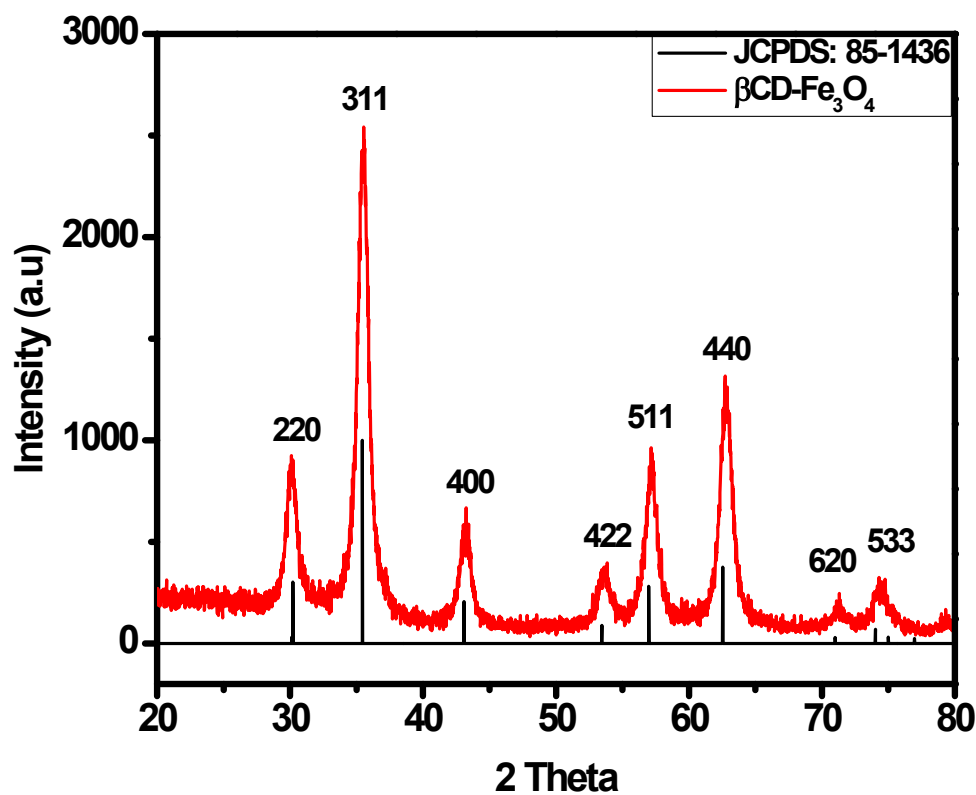

Fig. S3 XRD patterns of the  $\beta$ CD-Fe<sub>3</sub>O<sub>4</sub> nanoparticles.

**Table S1** Physical properties of the polysulfone hollow fiber membrane substrate.

| Membrane          | Dimensions |         |                | Mean pore size <sup>a</sup> | MWCO <sup>a</sup> | Type of membrane |
|-------------------|------------|---------|----------------|-----------------------------|-------------------|------------------|
|                   | OD (μm)    | ID (μm) | Thickness (μm) |                             |                   |                  |
| Polysulfone (PSf) | 1400       | 1000    | 200            | 0.20 μm                     | 8000              | Ultrafiltration  |

<sup>a</sup>Pore size and MWCO data were supplied by manufacturer.

**Table S2** Comparison of the water vapor permeance and selectivity of the manufactured membranes with those of state-of-the-art nanocomposite membranes.

| Membrane                            | Type of membrane | Operating temperature (°C) | Operating pressure                 | Feed humidity                         | Feed flow rate (cm <sup>3</sup> /min) | Ref. |
|-------------------------------------|------------------|----------------------------|------------------------------------|---------------------------------------|---------------------------------------|------|
| R1: PSf/DABA-TMC-CTiO <sub>2</sub>  | Hollow fiber     | 30                         | 3 kg <sub>f</sub> /cm <sup>2</sup> | AH = 25~27 g/m <sup>3</sup>           | 1000                                  | 33   |
| R2: PES/PDA-DABA-TMC                | Hollow fiber     | 30                         | 3 kg <sub>f</sub> /cm <sup>2</sup> | RH = 70%                              | -                                     | 54   |
| R3: PES/CA-PEG                      | Hollow fiber     | 30                         | 3 bar                              | RH = 20%                              | -                                     | 22   |
| R4: PEI/PEBAX®1657                  | Flat sheet       | 21                         | 2 kg <sub>f</sub> /cm <sup>2</sup> | RH = 47%                              | -                                     | 19   |
| R5: PES/DABA-TMC                    | Hollow fiber     | 30                         | 3 kg <sub>f</sub> /cm <sup>2</sup> | RH = 70%                              | 1000                                  | 55   |
| R6: PSf/MPD-TMC-OH-TiO <sub>2</sub> | Hollow fiber     | 30                         | 3 kg <sub>f</sub> /cm <sup>2</sup> | RH = 15~80%                           | 1000                                  | 56   |
| R7: BTESO-Me-SiO <sub>2</sub>       | Flat sheet       | 40                         | Atmospheric pressure               | RH = 0~90%                            | 500                                   | 57   |
| R8: PSf/NaA-zeolite                 | Hollow fiber     | 25                         | 350 kPa                            | Water concentration = 0.13 ± 0.03 wt% | 200                                   | 58   |
| R9: Mem-CoSi-3                      | Flat sheet       | 300~500                    | -                                  | -                                     | -                                     | 59   |
| R10: PSf/MPD-TMC-Si NPs             | Hollow fiber     | 30                         | 3 kg <sub>f</sub> /cm <sup>2</sup> | RH = 80%                              | 1000                                  | 52   |
| R11: PSf/MPD-TMC                    | Hollow fiber     | 30                         | 3 kg <sub>f</sub> /cm <sup>2</sup> | AH = 30~32 g/m <sup>3</sup>           | 1000                                  | 60   |
| R12: ABn-NH-TFN-3                   | Hollow fiber     | 30-60                      | 3 kg <sub>f</sub> /cm <sup>2</sup> | RH = 30~70%                           | 1000                                  | 61   |
| R13: PSf/DABA-TMC-ETS-4             | Hollow fiber     | 30                         | 3 kg <sub>f</sub> /cm <sup>2</sup> | AH = 26~29 g/cm <sup>3</sup>          | 600~2200                              | 62   |
| R14: PSf/DETA-TMC-sβCD              | Hollow fiber     | 30                         | 3 kg <sub>f</sub> /cm <sup>2</sup> | AH = 26~29 g/cm <sup>3</sup>          | 1000                                  | 40   |
| R15: PSf/MPD-TMC-MOF                | Hollow fiber     | 30                         | 3 kg <sub>f</sub> /cm <sup>2</sup> | RH = 70~80%                           | 1200                                  | 35   |

|                                                                |              |    |                                    |             |      |           |
|----------------------------------------------------------------|--------------|----|------------------------------------|-------------|------|-----------|
| R16 : PSf/ DETA-TMC- $\beta$ CD-Fe <sub>3</sub> O <sub>4</sub> | Hollow fiber | 30 | 3 kg <sub>f</sub> /cm <sup>2</sup> | RH = 20~85% | 1000 | This work |
|----------------------------------------------------------------|--------------|----|------------------------------------|-------------|------|-----------|
